# Supplementary material
Source: ML conference proceedings conference paper supplement (https://openaccess.thecvf.com/content/ICCV2021/html/Wu_Collaborative_and_Adversarial_ICCV_2021_paper.html)
Supplement: Supplementary file 1 [file Wu_Collaborative_and_Adversarial_ICCV_2021_supplemental.pdf]

# Supplementary Material: Collaborative and Adversarial Learning of Focused and Dispersive Representations for Semi-supervised Polyp Segmentation

Huisi Wu<sup>1</sup> Guilian Chen<sup>1</sup> Zhenkun Wen<sup>1</sup> Jing Qin<sup>2</sup>  
<sup>1</sup>Shenzhen University <sup>2</sup>The Hong Kong Polytechnic University

## 1. The Setting of Hyper Parameters

In this work, we introduce four kinds of loss functions to compute the losses when our proposed method is trained under the supervised stage and semi-supervised stage, including  $\mathcal{L}_{dice}$  for calculating the segmentation loss,  $\mathcal{L}_{semi}$  for calculating the divergence between the confidence maps from two kinds of segmentation networks,  $\mathcal{L}_{adv}$  for training the first discriminator to produce confidence maps with high quality and  $\mathcal{L}'_{adv}$  for training the second discriminator to distinguish the segmentation results. Among these loss functions,  $T_{semi}$  is a hyper parameter set as the threshold to control the sensitivity of the self-taught process (signal maps). In the training process of our proposed method, we found that the adjustment results of  $T_{semi}$  was similar to the analysis of Hung’s. Besides,  $\lambda_{adv}$ ,  $\lambda'_{adv}$  and  $\lambda_{semi}$  are set to balance the primary adversarial training with labeled and unlabeled data. Furthermore,  $\lambda_{D_2}$  and  $\lambda'_{D_2}$  are two hyper parameters set to balance the auxiliary discriminator training according to the amount of labeled and unlabeled data. The complete hyper parameters analysis can be seen in Table 1 and Table 2.

As shown in Table 3, our proposed method trained with fully labeled polyp images can achieve comparable segmentation results to PraNet [2] and HarDNet-MSEG [3].

## 2. More Experiments Results of Different Labeled Amount

To further explore the effectiveness of our proposed semi-supervised method for polyp segmentation, we evaluate the proposed method on the Kvasir-SEG [4] dataset and CVC-Clinic DB [1] with more different labeled amount settings. Statistical comparisons are as shown in Table 3.

## 3. More Comparison with Other Semi-supervised Methods

We also compare our proposed method with other semi-supervised methods, including TCSM\_v1 [5], TCSM\_v2 [6] and UA-MT [7]. Specially, the latter two semi-supervised

| Labeled Amount | $\lambda_{adv}$ | $\lambda'_{adv}$ | $\lambda_{semi}$ | Dice          | IoU           | MAE           |
|----------------|-----------------|------------------|------------------|---------------|---------------|---------------|
| 100%           | 0.005           | \                | \                | 0.8610        | 0.7826        | 0.0593        |
| <b>100%</b>    | <b>0.01</b>     | \                | \                | <b>0.8682</b> | <b>0.7882</b> | <b>0.0540</b> |
| 100%           | 0.02            | \                | \                | 0.8669        | 0.7846        | 0.0568        |
| 100%           | 0.05            | \                | \                | 0.8601        | 0.7819        | 0.0574        |
| <b>30%</b>     | <b>0.01</b>     | <b>0.001</b>     | <b>0.1</b>       | <b>0.8095</b> | <b>0.7163</b> | <b>0.0658</b> |
| 30%            | 0.01            | 0.001            | 0.2              | 0.8003        | 0.6800        | 0.0690        |
| 30%            | 0.01            | 0.001            | 0.5              | 0.7991        | 0.6987        | 0.0723        |
| 30%            | 0.01            | 0.002            | 0.1              | 0.8041        | 0.7128        | 0.0678        |
| 30%            | 0.01            | 0.002            | 0.2              | 0.7913        | 0.6956        | 0.0790        |
| 30%            | 0.01            | 0.002            | 0.5              | 0.7993        | 0.6999        | 0.0761        |
| 30%            | 0.01            | 0.005            | 0.1              | 0.8056        | 0.7172        | 0.0677        |
| 30%            | 0.01            | 0.005            | 0.2              | 0.8042        | 0.7058        | 0.0681        |
| 30%            | 0.01            | 0.005            | 0.5              | 0.7966        | 0.7111        | 0.0752        |

Table 1. Hyper parameter analysis for the primary adversarial learning on Kvasir-SEG dataset. Note that  $\lambda_{D_2}$  and  $\lambda'_{D_2}$ , which are the hyper parameters in auxiliary adversarial training, are set to the same as 0.01 and 0.05 respectively.

| Labeled Amount | $\lambda_{D_2}$ | $\lambda'_{D_2}$ | Dice          | IoU           | MAE           |
|----------------|-----------------|------------------|---------------|---------------|---------------|
| 30%            | 0.01            | 0.01             | 0.7945        | 0.6968        | 0.0865        |
| 30%            | 0.01            | 0.02             | 0.7975        | 0.7081        | 0.0741        |
| 30%            | 0.01            | 0.03             | 0.7982        | 0.7092        | 0.0716        |
| 30%            | 0.01            | 0.04             | 0.8030        | 0.7137        | 0.0698        |
| <b>30%</b>     | <b>0.01</b>     | <b>0.05</b>      | <b>0.8095</b> | <b>0.7163</b> | <b>0.0658</b> |
| 30%            | 0.01            | 0.06             | 0.7938        | 0.7082        | 0.0751        |

Table 2. Hyper parameter analysis for the auxiliary adversarial learning on Kvasir-SEG dataset. The setting of hyper parameters for primary adversarial training are the same.

methods apply the method of mean teacher, which has brought improvement to TCSM\_v1. For UA-MT, the proposed mechanism of uncertainty estimation can improve the credibility of predicted target generated by the teacher model to a certain extent. However, these methods are devoted to improve the reliability of teacher model, ignoring the effective extraction of edge information. The relative experimental results are shown in Table 4.

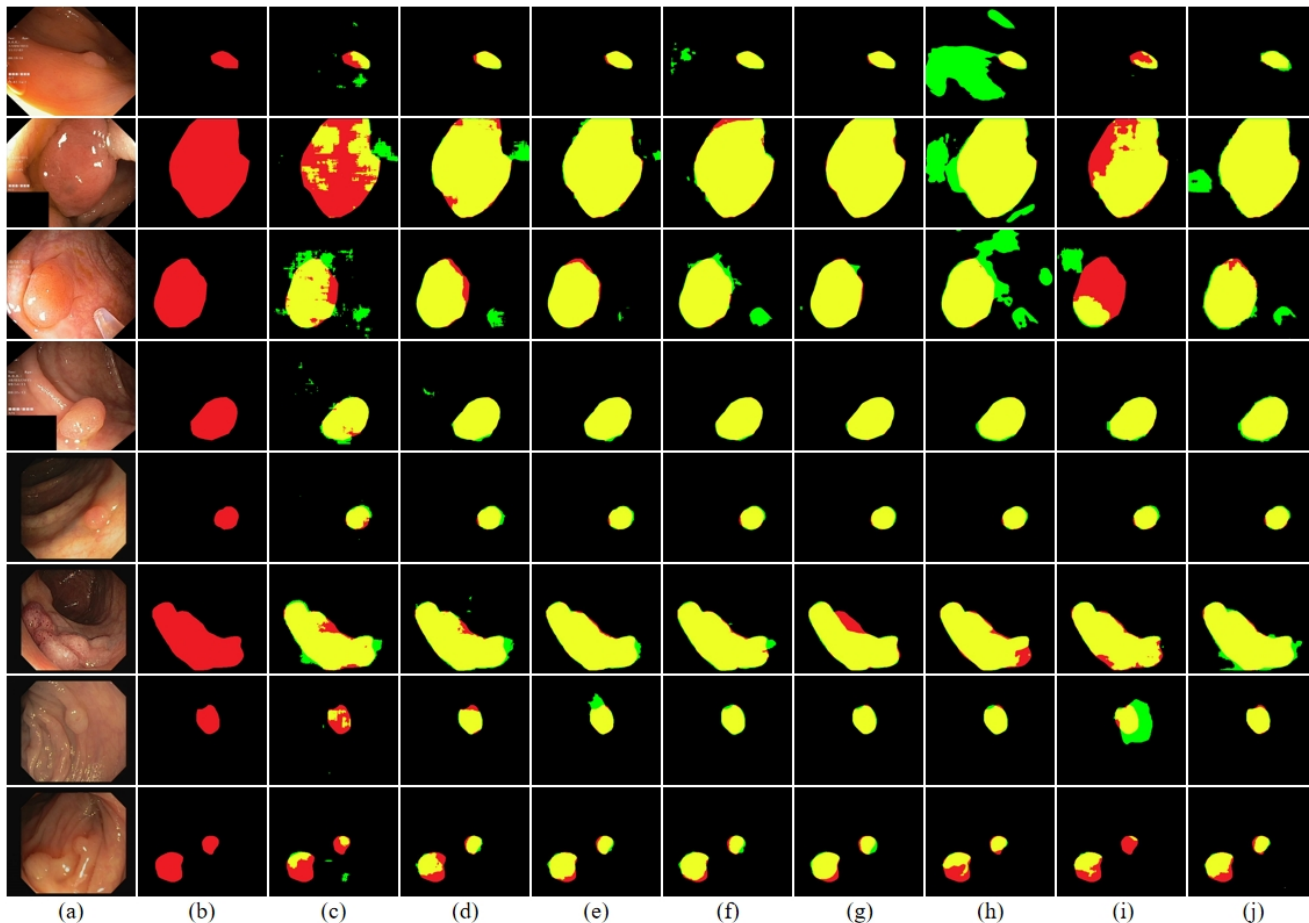

Figure 1. More comparisons with different State-of-the-art methods on the Kvasir-SEG dataset and CVC-Clinic DB. (a) Input image. (b) Ground Truth. (c) ResU-Net. (d) U-Net++. (e) CE-Net. (f) CPF-Net. (g) PraNet. (h) HarDNet-MSEG. (i) Hung’s. (j)Ours. Note that, Hung’s method and our semi-supervised polyp segmentation method are trained with only 30% of labeled data. Red, green and yellow regions represent the ground truth, prediction and their overlapping regions respectively.

| Dataset       | Labeled Amount | Dice   | IoU    | MAE    |
|---------------|----------------|--------|--------|--------|
| Kvasir-SEG    | 10%            | 0.7112 | 0.6066 | 0.1043 |
|               | 50%            | 0.8324 | 0.7303 | 0.0603 |
|               | 100%           | 0.8682 | 0.7882 | 0.0540 |
| CVC-Clinic DB | 10%            | 0.7506 | 0.6546 | 0.0478 |
|               | 50%            | 0.9218 | 0.8595 | 0.0153 |
|               | 100%           | 0.9472 | 0.8914 | 0.0094 |

Table 3. Statistical comparison of different labeled amount on the Kvasir-SEG dataset and the CVC-Clinic DB.

#### 4. More Visual Comparison Results

More visual polyp segmentation results on the Kvasir-SEG [4] dataset and CVC-Clinic DB [1] are presented in Figure 1.

#### References

[1] Jorge Bernal, F Javier Sánchez, Gloria Fernández-Esparrach, Debora Gil, Cristina Rodríguez, and Fernando Vilarinho. Wm-

| Model       | Labeled Amount | Dice          | IoU           | MAE           |
|-------------|----------------|---------------|---------------|---------------|
| TCSM_v1     | 15%            | 0.6919        | 0.5826        | 0.1063        |
| TCSM_v1     | 30%            | 0.7591        | 0.6783        | 0.0844        |
| TCSM_v2     | 15%            | 0.7173        | 0.6137        | 0.1002        |
| TCSM_v2     | 30%            | 0.7731        | 0.6866        | 0.0808        |
| UA-MT       | 15%            | 0.7409        | 0.6437        | 0.0875        |
| UA-MT       | 30%            | 0.7893        | 0.6995        | 0.0751        |
| <b>Ours</b> | <b>15%</b>     | <b>0.7676</b> | <b>0.6723</b> | <b>0.0816</b> |
| <b>Ours</b> | <b>30%</b>     | <b>0.8095</b> | <b>0.7163</b> | <b>0.0658</b> |

Table 4. Statistical comparison with TCSM\_v1 [5], TCSM\_v2 [6] and UA-MT [7] on the Kvasir-SEG dataset

dova maps for accurate polyp highlighting in colonoscopy: Validation vs. saliency maps from physicians. *Computerized Medical Imaging and Graphics*, 43:99–111, 2015.

[2] Deng-Ping Fan, Ge-Peng Ji, Tao Zhou, Geng Chen, Huazhu Fu, Jianbing Shen, and Ling Shao. Pranet: Parallel reverse attention network for polyp segmentation. In *International Con-*

*ference on Medical Image Computing and Computer-Assisted Intervention*, pages 263–273. Springer, 2020.

- [3] Chien-Hsiang Huang, Hung-Yu Wu, and Youn-Long Lin. Hardnet-mseg: A simple encoder-decoder polyp segmentation neural network that achieves over 0.9 mean dice and 86 fps. *arXiv preprint arXiv:2101.07172*, 2021.
- [4] Debesh Jha, Pia H Smedsrud, Michael A Riegler, Pål Halvorsen, Thomas de Lange, Dag Johansen, and Håvard D Johansen. Kvasir-seg: A segmented polyp dataset. In *International Conference on Multimedia Modeling*, pages 451–462. Springer, 2020.
- [5] Xiaomeng Li, Lequan Yu, Hao Chen, Chi-Wing Fu, and Pheng-Ann Heng. Semi-supervised skin lesion segmentation via transformation consistent self-ensembling model. In *29th British Machine Vision Conference, BMVC 2018*, 2018.
- [6] Xiaomeng Li, Lequan Yu, Hao Chen, Chi-Wing Fu, Lei Xing, and Pheng-Ann Heng. Transformation-consistent self-ensembling model for semisupervised medical image segmentation. *IEEE Transactions on Neural Networks and Learning Systems*, 32(2):523–534, 2020.
- [7] Lequan Yu, Shujun Wang, Xiaomeng Li, Chi-Wing Fu, and Pheng-Ann Heng. Uncertainty-aware self-ensembling model for semi-supervised 3d left atrium segmentation. In *International Conference on Medical Image Computing and Computer-Assisted Intervention*, pages 605–613. Springer, 2019.
